# Supplementary material for: Efficient two-dimensional Cs2PbI2(SCN)2 perovskite solar cells via intermediate-modulated crystallization
Source: Royal Society of Chemistry journal article supplement (doi:10.1039/d2ta08625e), 2023-01-01
Supplement: d2ta08625e1.pdf [file d2ta08625e1.pdf]

Supporting information

Efficient two-dimensional  $\text{Cs}_2\text{PbI}_2(\text{SCN})_2$  perovskite solar cells via  
intermediate-modulated crystallization

Jia Xu,<sup>†</sup> Qiaohui Wu,<sup>†</sup> Yiwu He,<sup>†</sup> Meina Cui,<sup>†</sup> Huifang Han,<sup>†</sup> Huijing Liu,<sup>†</sup> Jianxi Yao<sup>\*,†</sup>

<sup>†</sup>*State Key Laboratory of Alternate Electrical Power System with Renewable Energy Sources, Beijing Key Laboratory of Energy Safety and Clean Utilization, North China Electric Power University, Beijing 102206, China*

*\* Corresponding author's email: [jianxiyao@ncepu.edu.cn](mailto:jianxiyao@ncepu.edu.cn)*

## Methods for fitting and numerical calculation:

### (a) Time-resolved photoluminescence (TRPL)

The TRPL curves were fitted with a bi-exponential decay function to describe the process of charge extraction.

$$I(t) = A_1 e^{(-t/\tau_1)} + A_2 e^{(-t/\tau_2)} + \gamma_0 \quad (1)$$

$\tau_1$  is the rapid decay of charge transfer from perovskite to adjacent layers through the boundary,  $\tau_2$  is the slow recombination of charges in the perovskite layer.

### (b) Space charge limited current

The trap density can be calculated from the following equation (2):

$$V_{TFL} = \frac{qN_t L^2}{2\varepsilon_r \varepsilon_0} \quad (2)$$

where L is the thickness of the perovskite film,  $\varepsilon_r$  is the relative dielectric constant of perovskite,  $\varepsilon_0$  is the vacuum permittivity ( $8.854 \times 10^{-12}$  F/m),  $q$  is the unit charge with the value of  $1.602 \times 10^{-19}$  C, and  $N_t$  is the trap density. Through the capacitance (C) – voltage (V) measurement and equation (3) the perovskite dielectric constant ( $\varepsilon_r$ ) is calculated:

$$C = \frac{\varepsilon_r \varepsilon_0 S}{d} \quad (3)$$

where C,  $\varepsilon_0$ , S, and D represent capacitance, vacuum dielectric constant, device area, and perovskite film thickness, respectively.

### (c) Density functional theory (DFT) calculations

In this work, the DFT calculations were performed by the Cambridge serial total energy package (CASTEP)<sup>1</sup> code, in which a plane wave basis set was used. The exchange and correlation interactions were modeled using the generalized gradient approximation (GGA) and the Perdew–Burke–Ernzerhof (PBE)<sup>2</sup> functional. The Vanderbilt ultrasoft pseudopotential<sup>3</sup> was used with a cutoff energy of 450 eV. Geometric convergence tolerances were set for maximum force of 0.03 eV/Å, maximum energy change of  $10^{-5}$  eV/atom, maximum displacement of 0.001 Å and maximum stress of 0.5 GPa. The sampling in the Brillouin zone was set with  $3 \times 3 \times 1$  by the Monkhorst-Pack method.

The substitution energy of iodine for chlorine is defined as:

$$E_s = E_{\text{SCNCsPbI}(x+1)\text{Cl}(y-1)} - E_{\text{SCNCsPbIxCl}_y} + E_{\text{FAI}(z-1)\text{Cl}(z+1)} - E_{\text{FAI}(z+1)\text{Cl}(z-1)} \quad (4)$$

The incorporation energy of iodine into the SCNCsPbICI/SCNCsPbI system is defined as:

$$E_{\text{Incorporation}} = E_{\text{SCNCsPbI}(x+1)\text{Cl}_y} - E_{\text{SCNCsPbIxCl}_y} - E_{\text{I}} \quad (5)$$

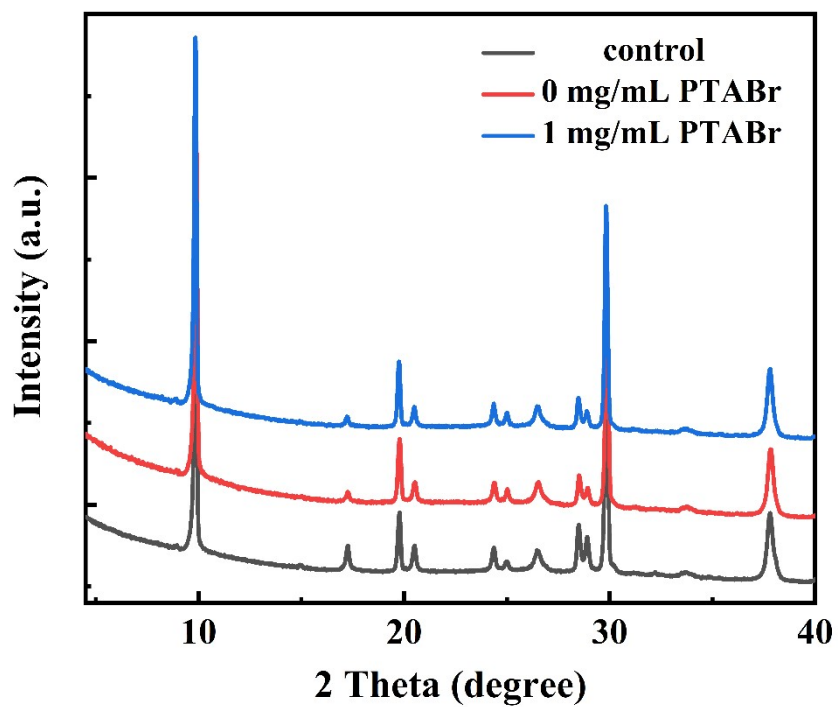

**Figure S1.** XRD patterns of  $\text{Cs}_2\text{PbI}_2(\text{SCN})_2$  control film without any post-treatment, film after post-treatment with neat isopropanol solution, i.e., containing 0 mg/mL PTABr, and film after post-treatment with isopropanol solution containing 1 mg/mL PTABr.

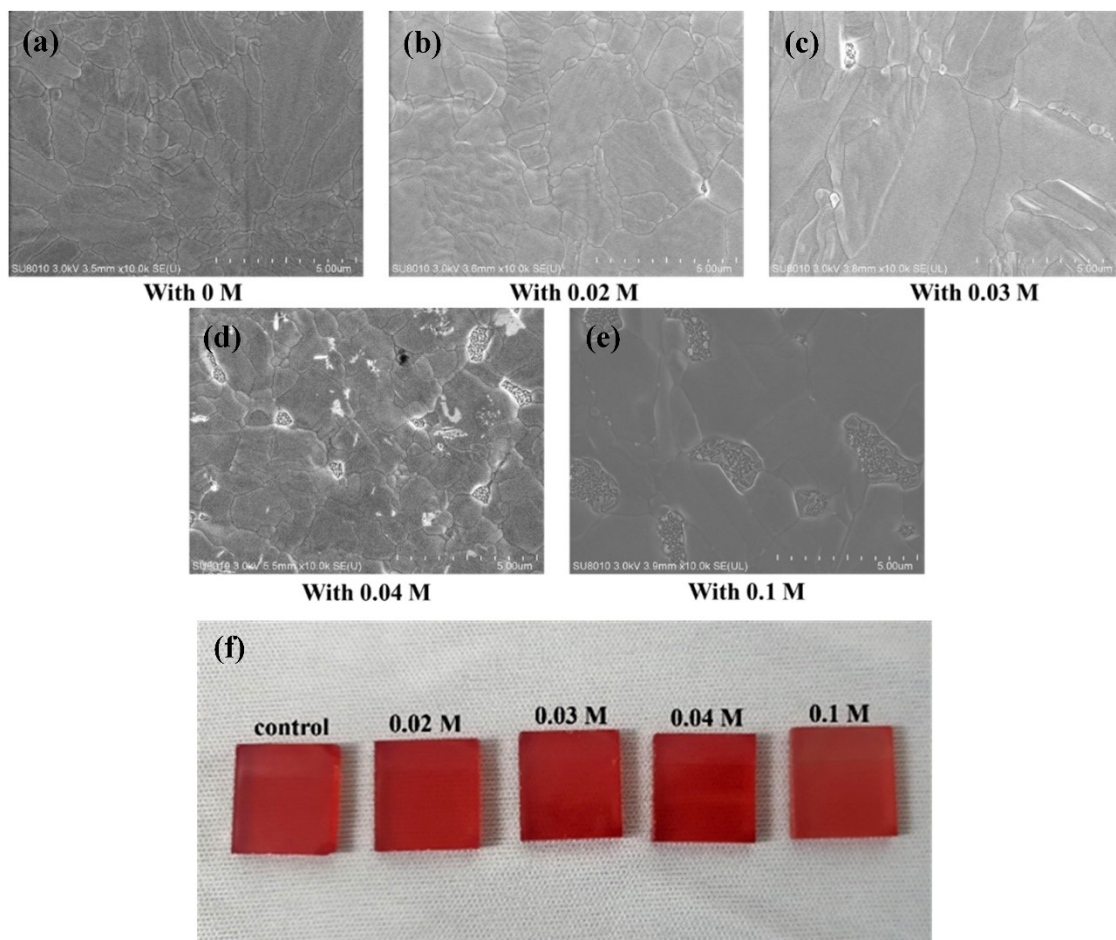

**Figure S2.** (a)-(e) SEM images of  $\text{Cs}_2\text{PbI}_2(\text{SCN})_2$  thin films prepared by adding different amounts of FACL. (f) Optical photographs of  $\text{Cs}_2\text{PbI}_2(\text{SCN})_2$  films prepared with different amounts of FACL.

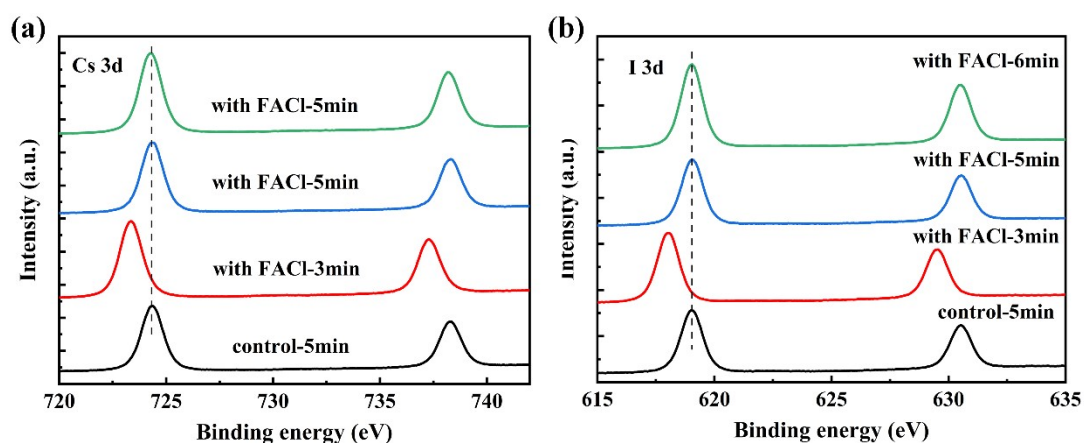

**Figure S3.** XPS patterns for (a) Cs 3d and (b) I 3d for  $\text{Cs}_2\text{PbI}_2(\text{SCN})_2$  control sample, and films prepared with 0.02 M FACL additive and annealed for 3, 5 and 6 mins.

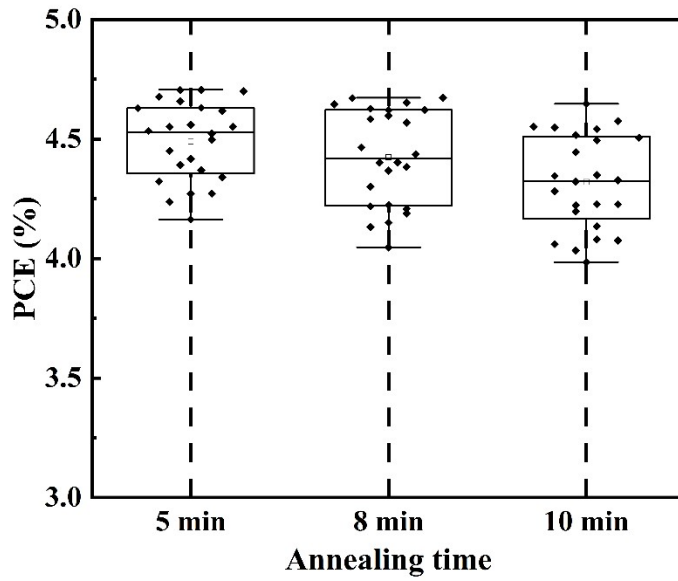

**Figure S4.** Statistical-results for the PCE values of the devices based on the  $\text{Cs}_2\text{PbI}_2(\text{SCN})_2$  films with prolonged annealing times.

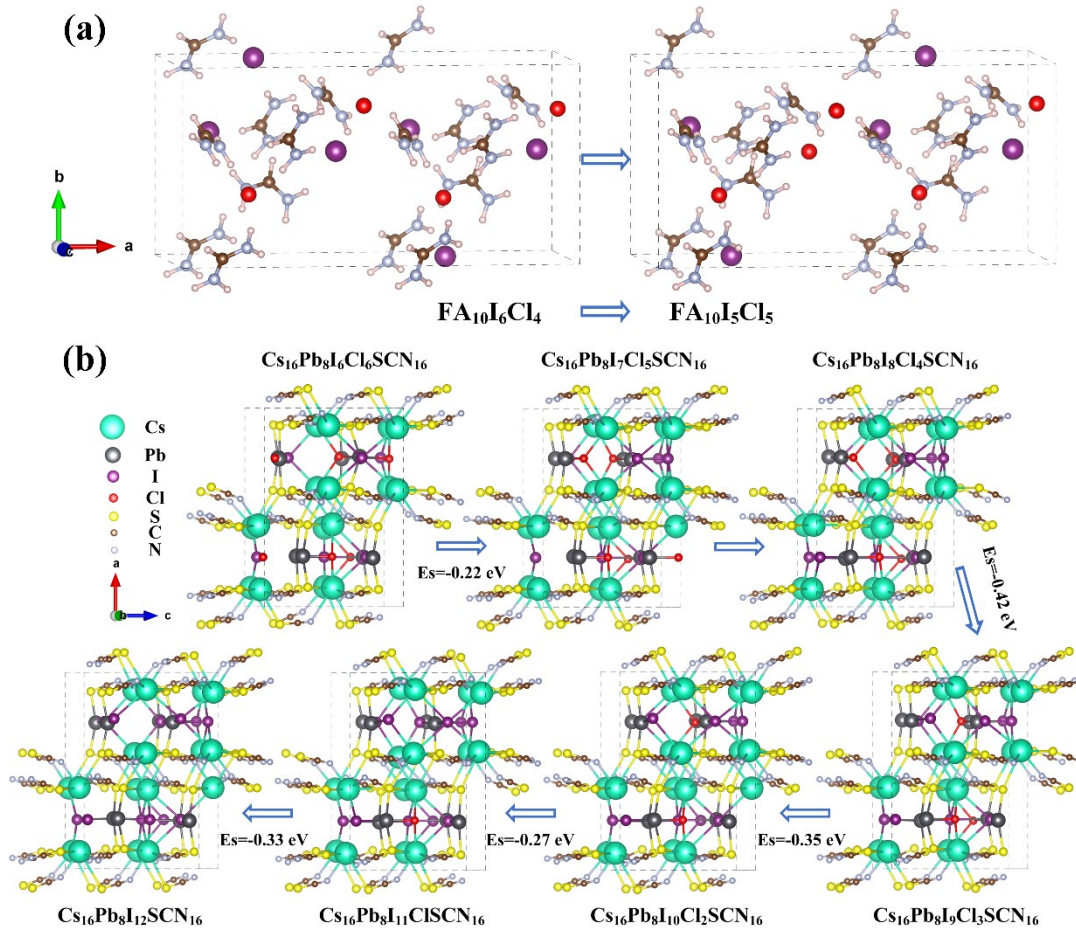

**Figure S5.** (a) Presence of elements I and Cl in the form of amorphous structures formed with FA cations. (b) substitution energy for I to replace Cl.

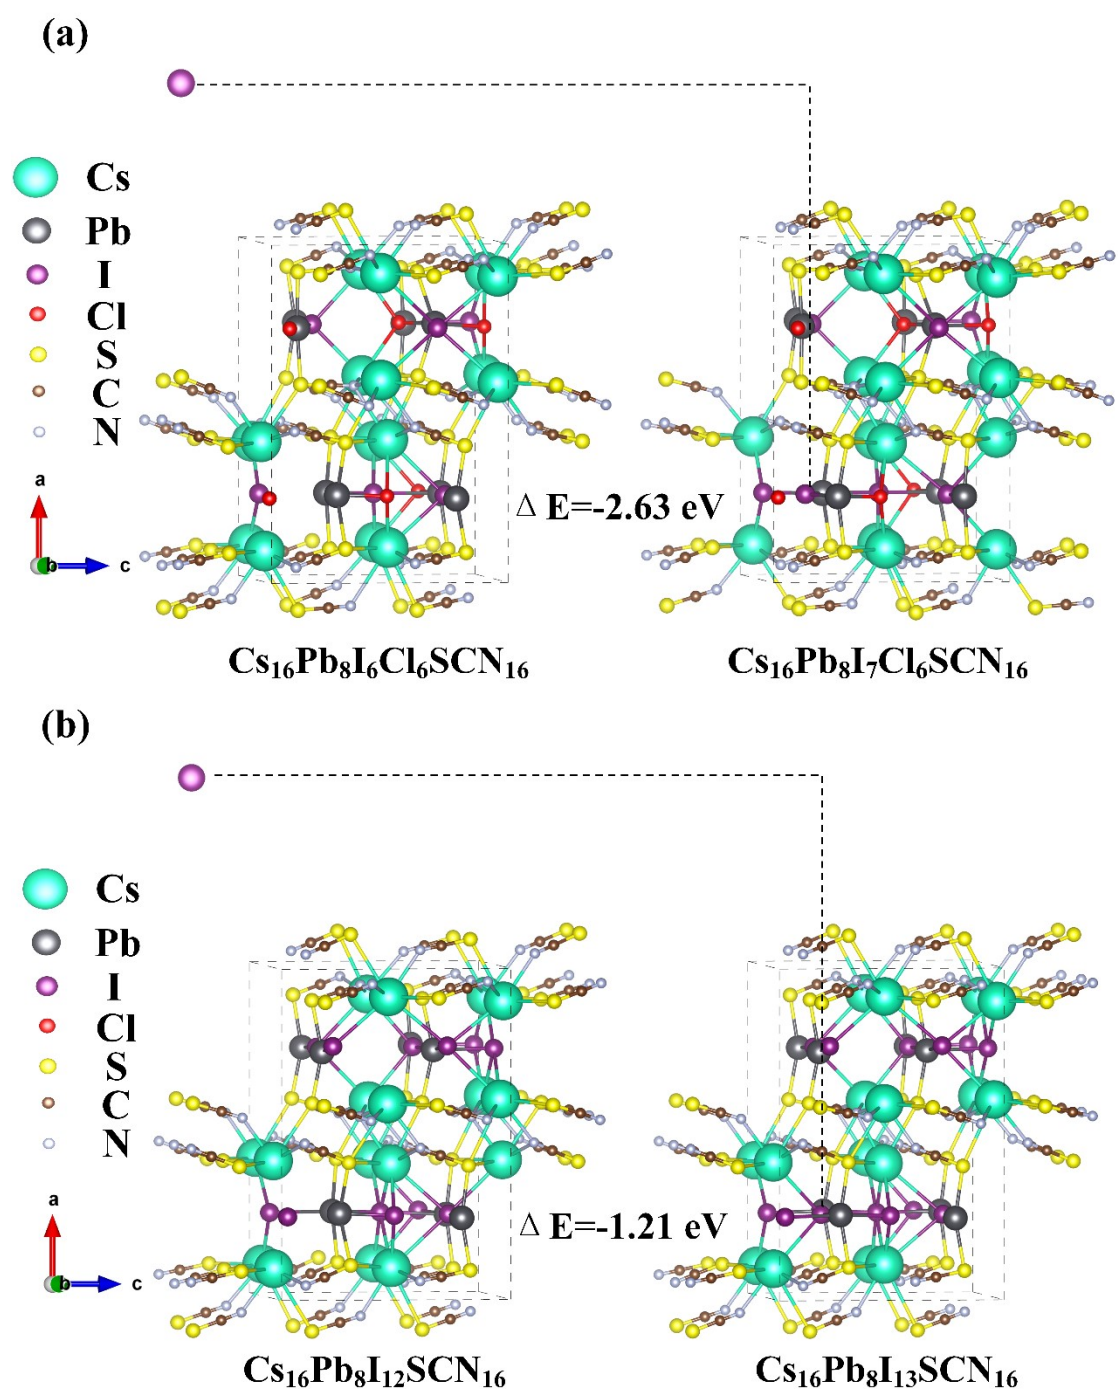

**Figure S6** (a) Energy difference between I–Cl mixed structure after addition of an I atom from the outside, (b) energy difference between pure I structure after addition of an I atom from outside.

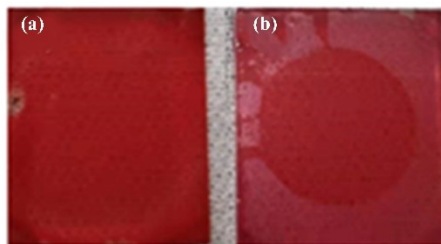

**Figure S7.** Optical photos of spiro-OMeTAD coated  $\text{Cs}_2\text{PbI}_2(\text{SCN})_2$  film (a) with / (b) without PTABr treatment.

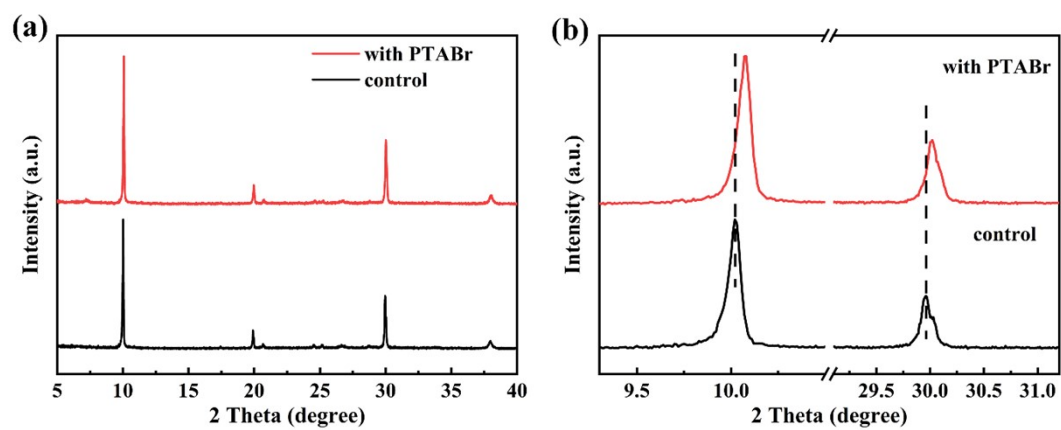

**Figure S8.** XRD patterns of  $\text{Cs}_2\text{PbI}_2(\text{SCN})_2$  films with and without PTABr post-treatment.

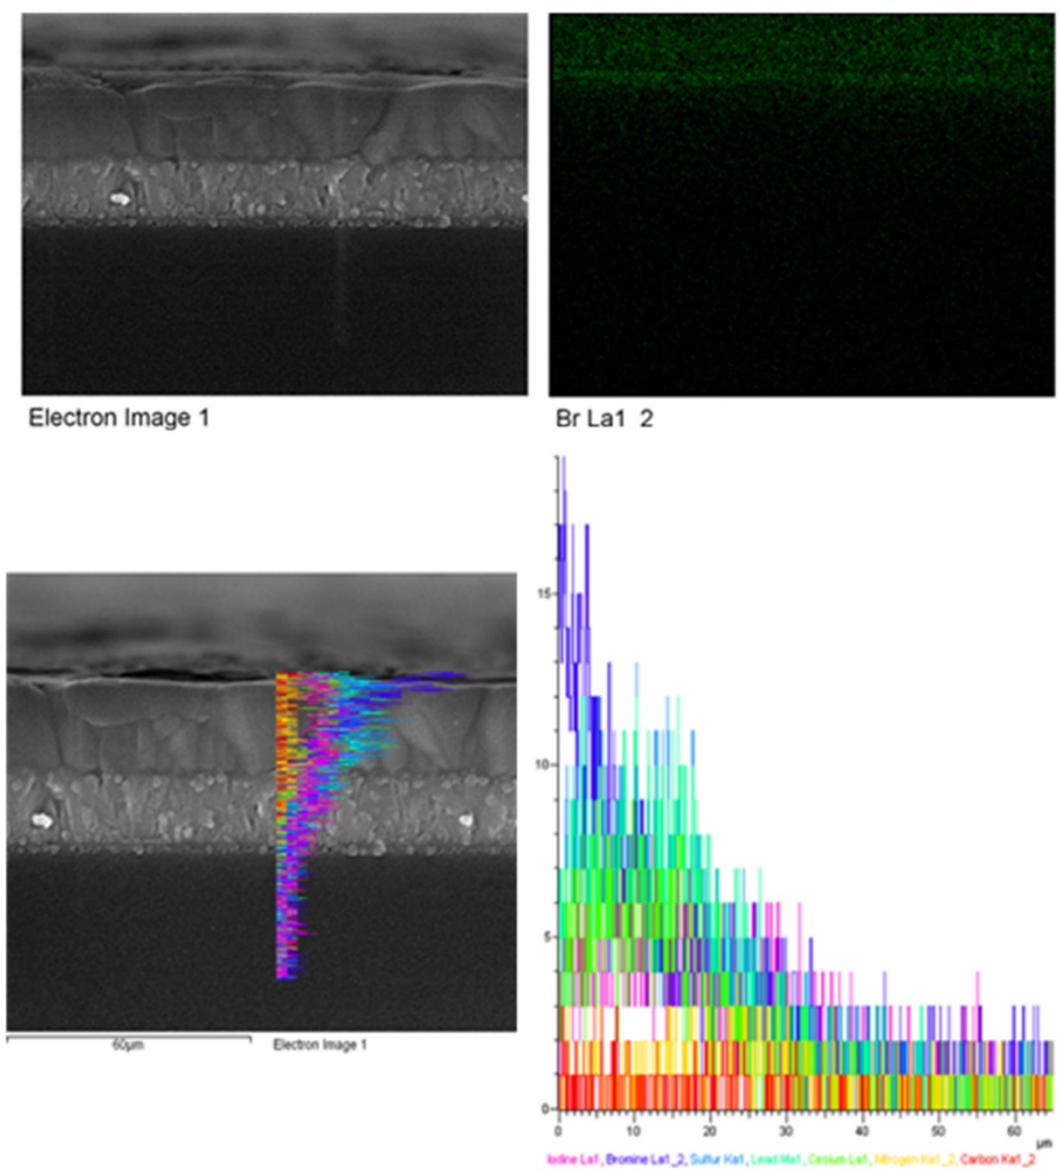

**Figure S9.** EDX images of  $\text{Cs}_2\text{PbI}_2(\text{SCN})_2$  film after PTABr post-treatment.



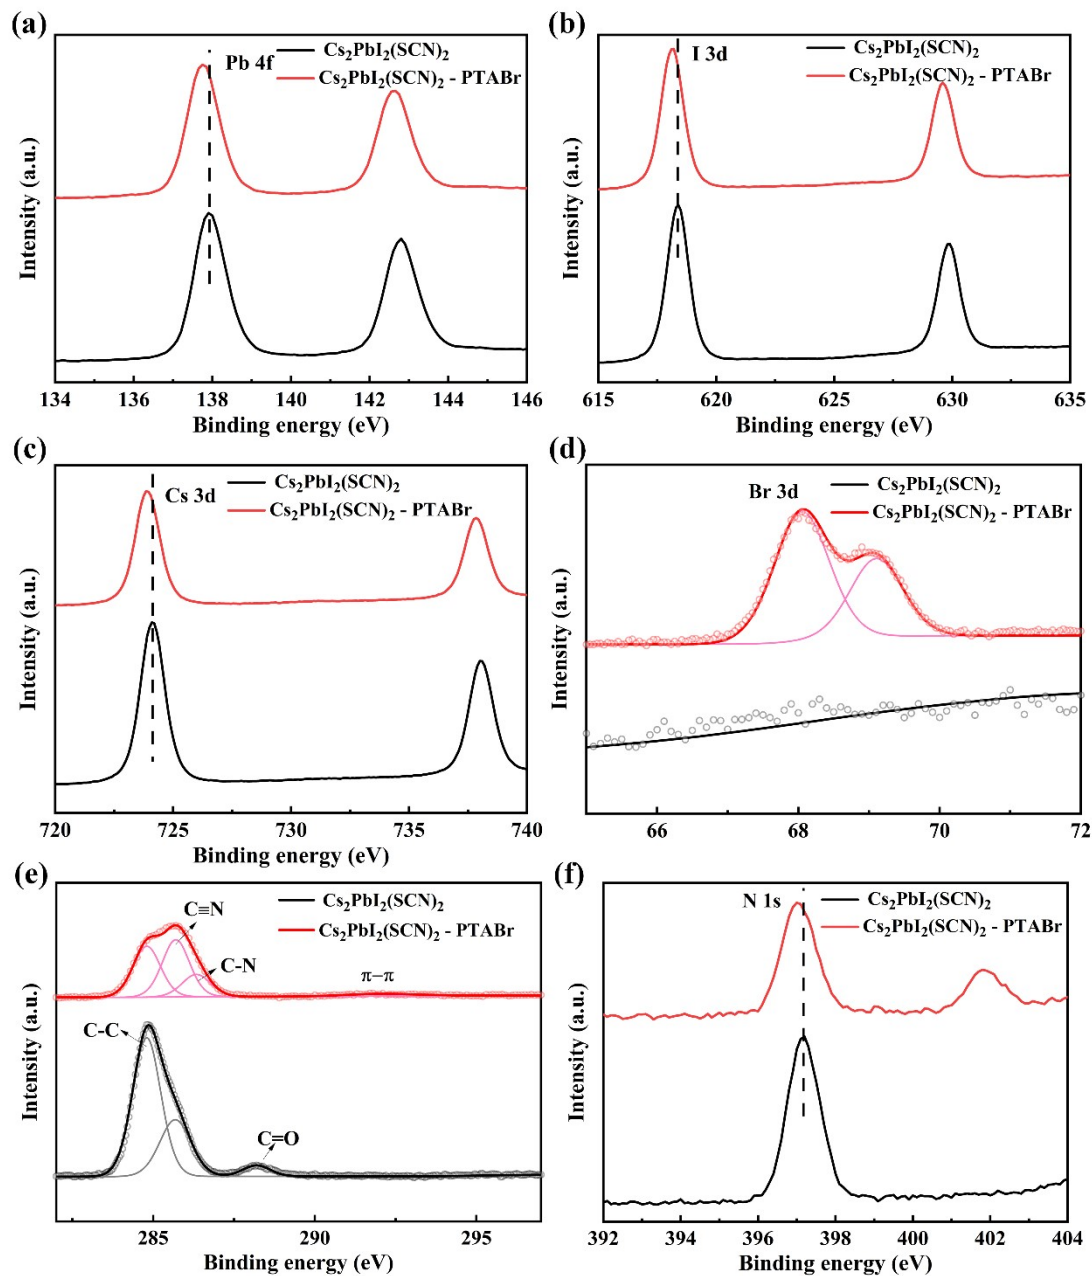

**Figure S10.** XPS patterns of  $\text{Cs}_2\text{PbI}_2(\text{SCN})_2$  control sample and films with PTABr post-treated.

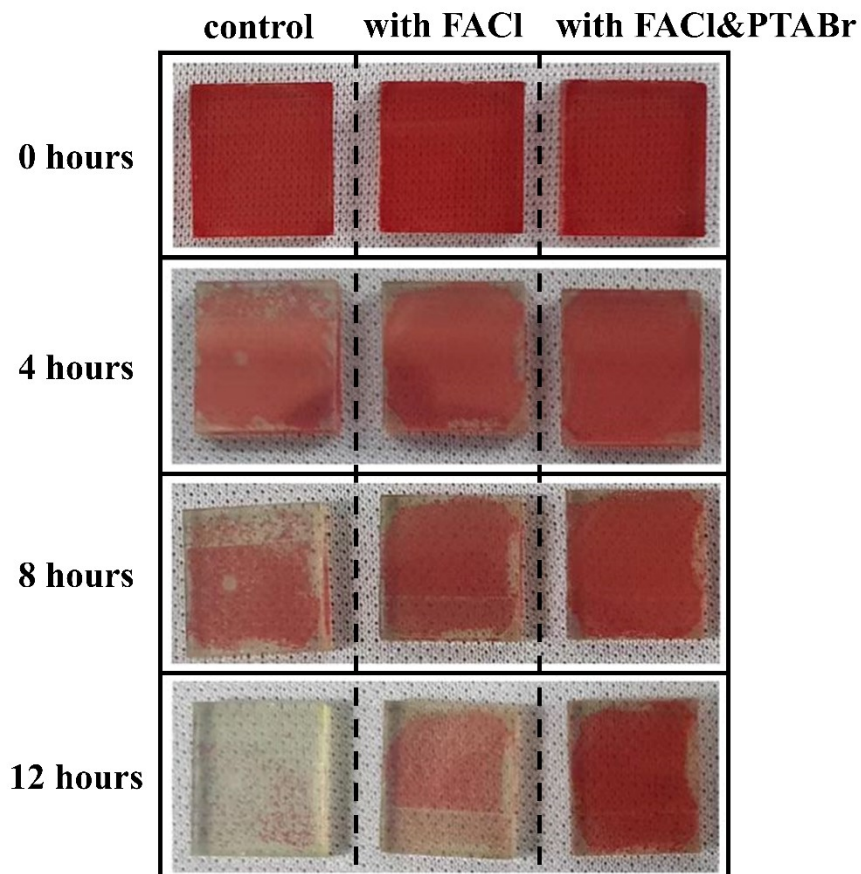

**Figure S11.** Photos recorded the changes in the three kinds of  $\text{Cs}_2\text{PbI}_2(\text{SCN})_2$  films every 4 hours from when they were freshly prepared to when they were left in the air (RH of 45%) for 12 hours.

#### Reference

1. M. D. Segall, P. J. D. Lindan, M. J. Probert, C. J. Pickard, P. J. Hasnip, S. J. Clark and M. C. Payne, *Journal of Physics: Condensed Matter*, 2002, **14**, 2717-2744.
2. J. P. Perdew, K. Burke and M. Ernzerhof, *Physical review letters*, 1996, **77**, 3865-3868.
3. D. Vanderbilt, *Physical Review B*, 1990, **41**, 7892-7895.
